# Supplementary material for: Label-free virtual staining of neutrophil extracellular traps (NETs) in microfluidics
Source: Royal Society of Chemistry journal article supplement (doi:10.1039/d3lc00398a), 2023-01-01
Supplement: d3lc00398a1.pdf [file d3lc00398a1.pdf]

## Supplementary information

### Label-free Virtual Staining of Neutrophil Extracellular Traps (NETs) in Microfluidics

Chayakorn Petchakup<sup>1</sup>, Siong Onn Wong<sup>1</sup>, Rinkoo Dalan<sup>2</sup>, Han Wei Hou<sup>1,3#</sup>

<sup>1</sup> *School of Mechanical and Aerospace Engineering, Nanyang Technological University, Singapore*

<sup>2</sup> *Endocrinology Department, Tan Tock Seng Hospital, Singapore*

<sup>3</sup> *Lee Kong Chian School of Medicine, Nanyang Technological University, Singapore*

#Corresponding author:

Assoc. Prof. Han Wei Hou (hwhou@ntu.edu.sg)

Tel: +65 67904950

School of Mechanical and Aerospace Engineering, Nanyang Technological University

50 Nanyang Avenue

Blk N3, Level 2, Room 86 (N3-02c-86)

Singapore 639798

Conflict of interest statement: The authors have declared that no conflict of interest exists.

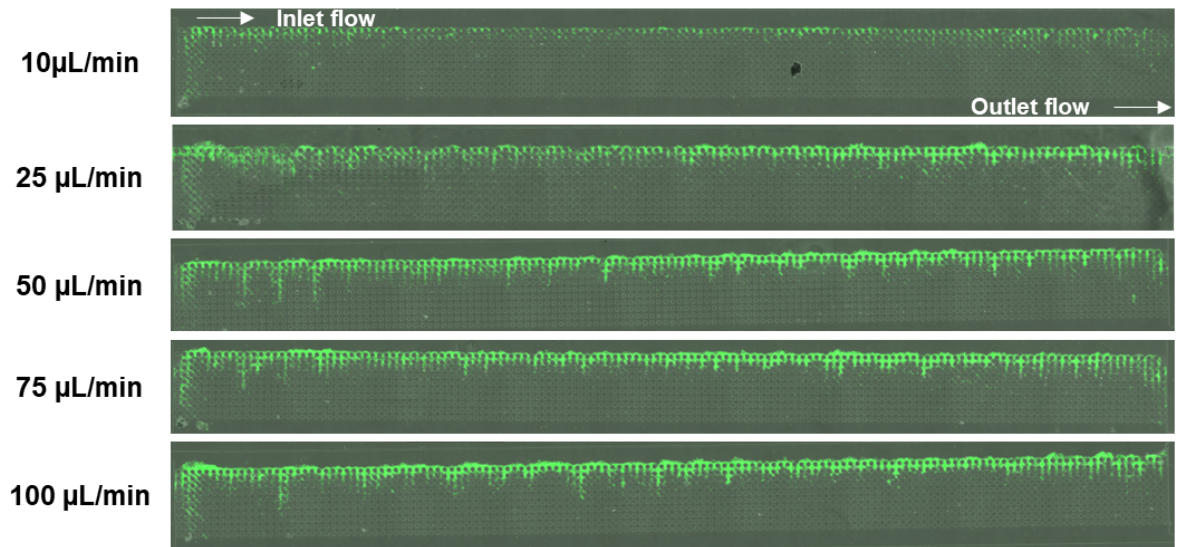

**Figure S1: The effect of flow rate variation on NETs trapping.** Fluorescent images of NETs trapped in microfluidic channel (whole device) at different flow rates.

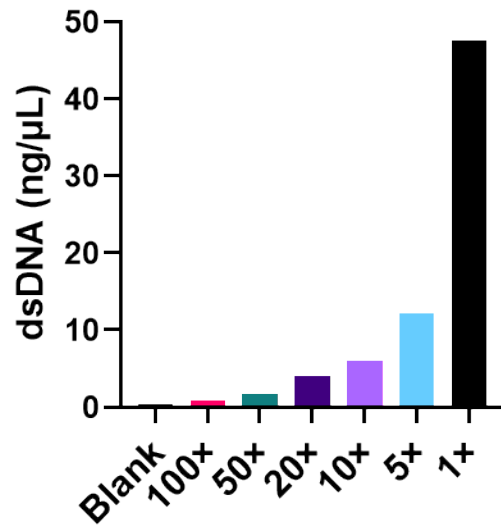

*Figure S2: NETs sample measurement using Nanodrop. Undiluted sample (1×) was NETs generated from 500k neutrophils/mL.*

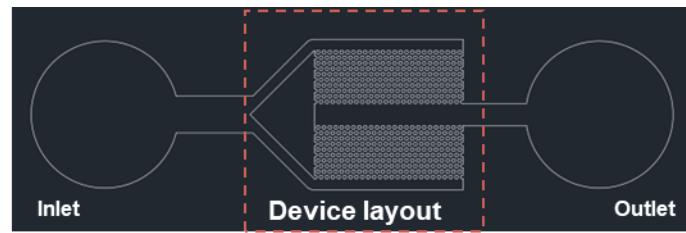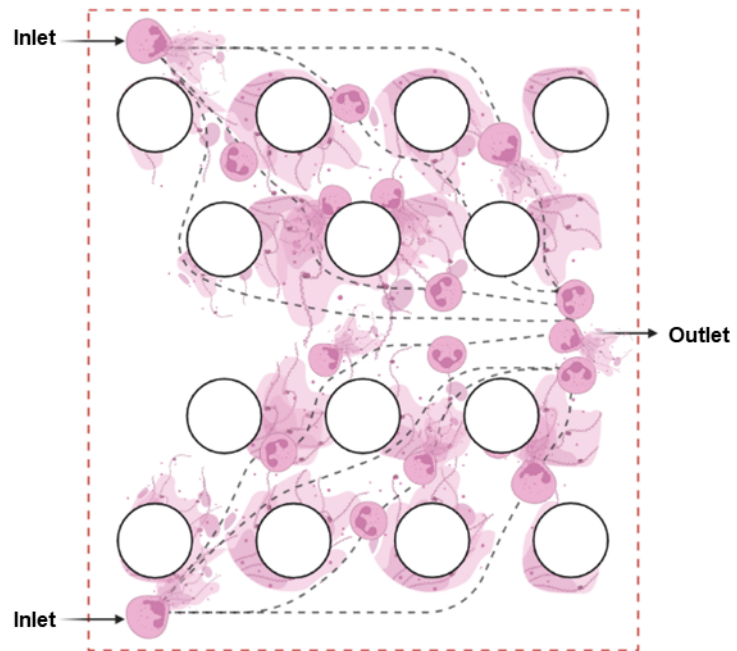

*Figure S3: Microfluidic device with two lanes of NETs trapping arrays.*
